# Supplementary material for: ZIF-67@POM hybrid-derived unique willow-shaped two-dimensional Mo-CoP nanostructures as efficient electrocatalysts for the oxygen evolution reaction
Source: Royal Society of Chemistry journal article supplement (doi:10.1039/d3nj01118f), 2023-01-01
Supplement: d3nj01118f1.pdf [file d3nj01118f1.pdf]

## Supporting Information

### Supporting Information contains:

Supplementary Discussions

Number of Figures: 11 (Figure S1 – S11)

### Supplementary Discussions

#### Experimental section

**ZIF-67@POM hybrids:** 0.012 g of CTAB was added in deionized water (25 mL) to form a clear solution.  $\text{Co}(\text{NO}_3)_2 \cdot 6\text{H}_2\text{O}$  (0.772 g) was then added to the obtained solution. Phosphomolybdic acid (0.100g) was rapidly added in deionized water (10 mL). Mixed and stirred the above two solutions for 30 minutes. 2-methylimidazole (1.629 g) was rapidly added in deionized water (25 mL). The two solutions were then mixed together and the mixture immediately turned purple. After 2.5 hours of agitation, the bluish-purple sediment was collected. The blue precipitates were continuously rinsed with methanol and deionized water. The precipitates were dried at 60 °C for 10 h.

**Mo-CoP-100:** The ZIF-67@POM powder was placed in a ceramic vessel containing 0.300 g of  $\text{NaH}_2\text{PO}_2 \cdot \text{H}_2\text{O}$  upstream of a horizontal tubular furnace. And subsequent calcination in nitrogen flow at 400 °C for 2 h gave rise to willow-shaped two-dimensional Mo-CoP nanostructures.

#### Characterization of Mo-CoP-100 hybrids

The morphology and structure of the samples were characterized on a Hitachi S4800 scanning electron microscope (SEM). Transmission electron microscope (TEM) and high-resolution transmission electron microscope (HRTEM) images were taken on a FEI Tecnai G2 F20 field emission TEM. And energy-dispersive X-ray spectroscopy were utilized to create elemental maps (EDS). X-ray diffraction (XRD) patterns were recorded on a Rigaku RINT-2200 X-ray diffractometer with a Cu K $\alpha$  source (40 kV, 20 mA) in the range  $2\theta = 10\text{-}80^\circ$ . The X-ray photoelectron spectroscopy (XPS) was used to study the surface chemistry of the samples by Thermo ESCALAB 250Xi analyzer (Al K $\alpha$  radiation,  $h\nu = 1486.6$  eV). XPS peaks were assigned using MultiPak Spectrum software and Perkin-Elmer Handbook of X-ray Photoelectron Spectroscopy data analysis and the peak deconvolution by using Gaussian–Lorentzian curve fitting based on Shirley background correction was accomplished with OriginPro 2016 software. The Raman spectra were recorded on a laser micro-Raman spectrometer (HORIBA Scientific, HR Evolution)

#### Electrochemical measurements

A CHI660E electrochemical workstation (CH Instrument Inc., shanghai) was used to measure the electrocatalytic activities. All electrochemical measurements were performed with a three-electrode configuration and carried out at room temperature, using electrocatalysts as the working electrode, a carbon rod as the counter electrode, and Hg/HgO (pH =14) were used as reference electrodes. All the measured potentials in this work were converted to reversible hydrogen electrode (RHE) potential

according to the Nernst equation ( $E_{\text{RHE}} = E_{(\text{vs.Hg/HgO})} + 0.098 + 0.059 \times \text{pH}$ ). Linear sweep voltammetry (LSV) were measured at a scanning rate of  $2 \text{ mV s}^{-1}$ . The Tafel curves were plotted according to the overpotential vs  $\log |j|$  from LSV data. Electrochemical impedance spectroscopy (EIS) was performed in a frequency range from  $10^5$  to  $10^{-2}$  Hz and an amplitude of 5 mV. ECSA was calculated by the doublelayer capacitance ( $C_{\text{dl}}$ ), which was evaluated by cyclic voltammetry (CV) curves at different scan rates in the potential ranges of 0.98 V to 1.08 V (vs. RHE) for OER.

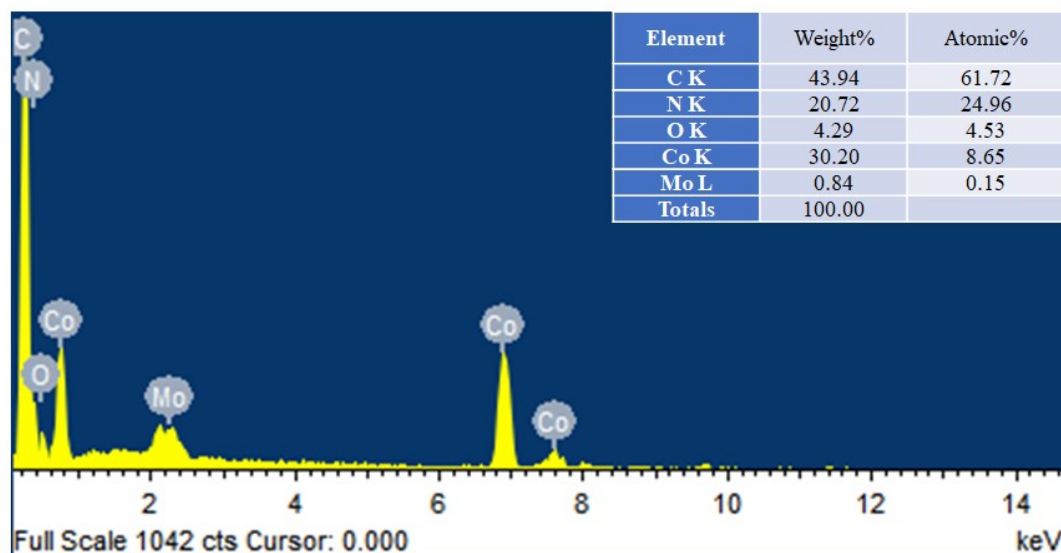

**Fig S1. EDX pattern of ZIF-67@POM**

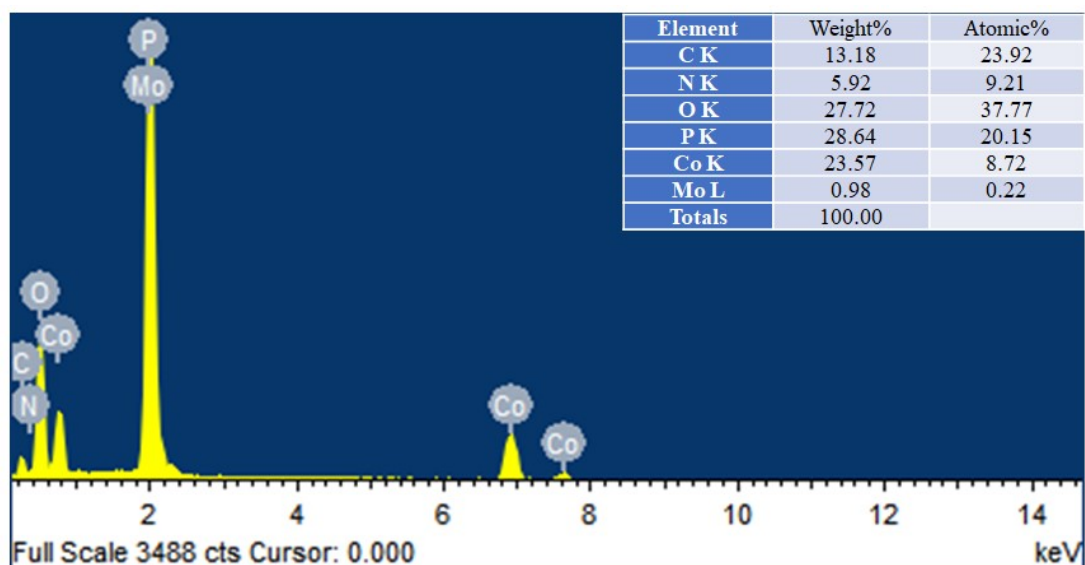

**Fig S2. EDX pattern of Mo-CoP-100**

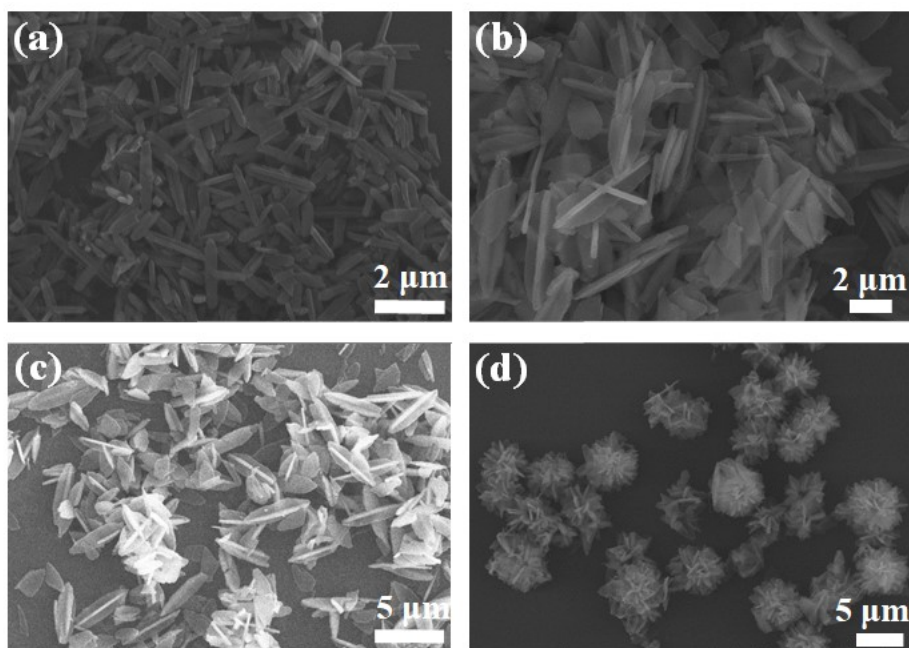

Fig S3. SEM images of (a) CoP; (b) Mo-CoP-50; c) Mo-CoP-100; d) Mo-CoP-200

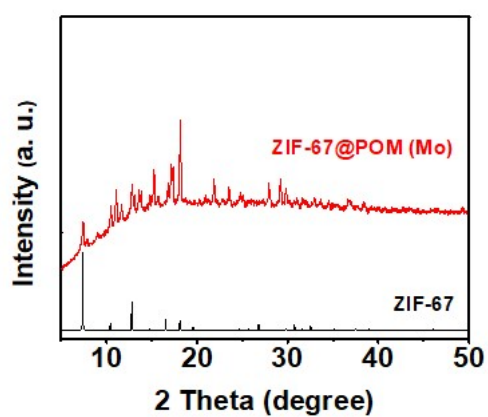

Fig. S4 XRD patterns of ZIF-67@POM(Mo) and ZIF-67;

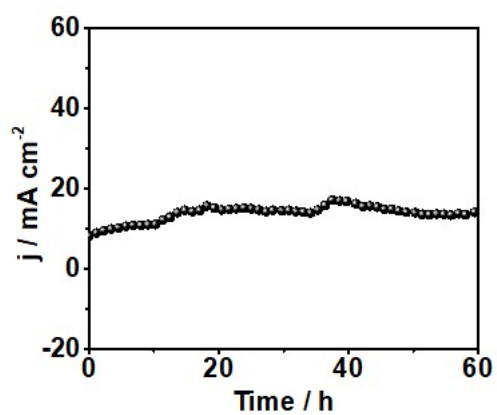

Fig. S5 Chronoamperometric testing of Mo-CoP-100 for 60 h.

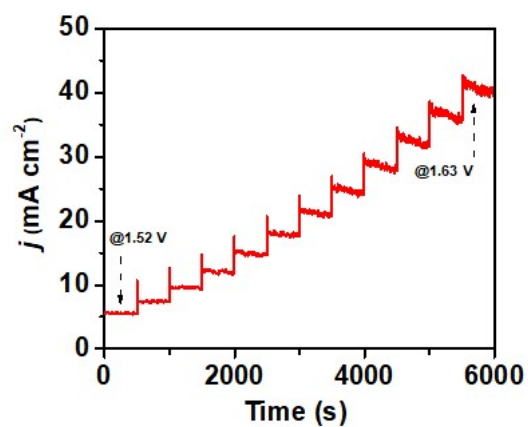

Fig. S6 Multicurrent OER processes of Mo-CoP-100 with a step of 0.01 V every 500 s

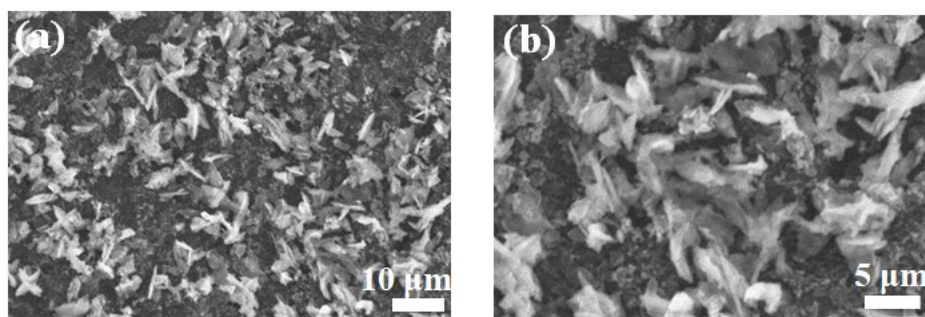

Fig. S7 SEM of Mo-CoP after accelerated durability test for 100 h.

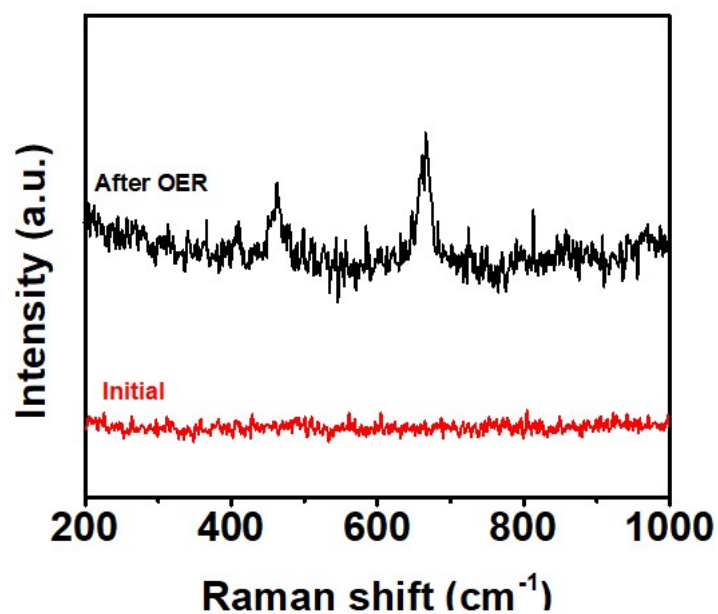

Fig. S8 Raman spectrum after the durability test.

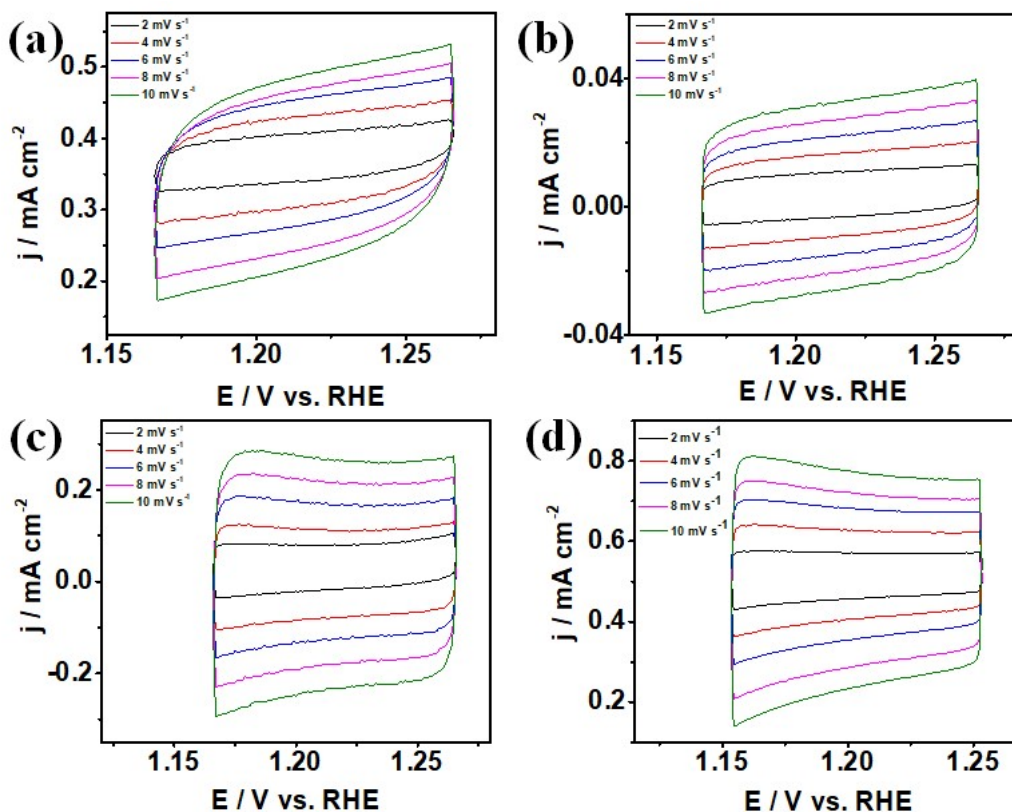

Fig. S9 CV curves of (a) ZIF-67, (b) CoP, (c) ZIF-67@POM, (d) Mo-CoP-100.

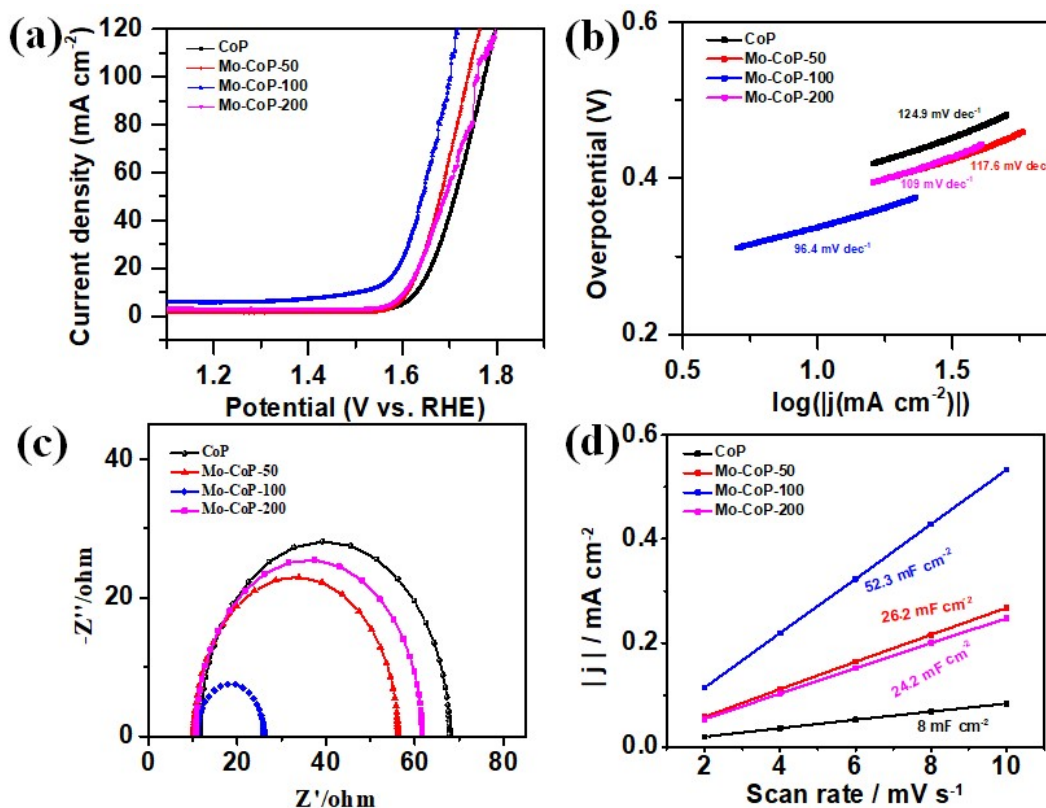

Fig. S10. (a) OER polarization curves of Mo-CoP-r at different amounts in 1.0 M KOH solution at a scan rate of 2 mV s<sup>-1</sup>. (b) Tafel plots of Mo-CoP-r at different amounts catalysts derived from OER curves. (c) Electrochemical impedance



spectra (EIS) of of Mo-CoP-r at different amounts. (d) Plots of the current density at 1.03 V vs. the scan rate to determine the double layer capacitance ( $C_{dl}$ ) of Mo-CoP-r at different amounts.

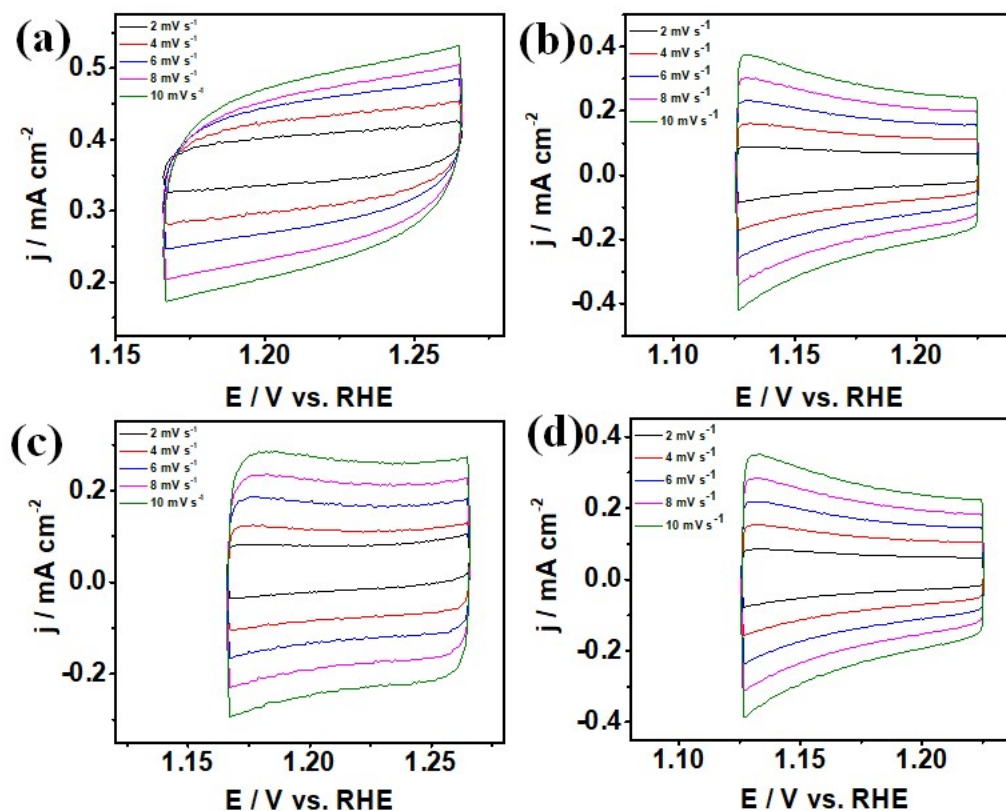

Fig. S11 CV curves of Mo-CoP-r at different amounts. (a) CoP, (b) Mo-CoP-50, (c) Mo-CoP-100, (d) Mo-CoP-200.

| Catalysts         | Overpotential             | Tafel slopes         | Electrolyte | Stability | Ref.      |
|-------------------|---------------------------|----------------------|-------------|-----------|-----------|
|                   | at 10 mA cm <sup>-2</sup> |                      |             |           |           |
|                   |                           | mV dec <sup>-1</sup> |             |           |           |
| Mo-CoP            | 290                       | 96.4                 | 1.0 M KOH   | 100 h     | This work |
| Ni <sub>2</sub> P | 320                       | 105                  | 1.0 M KOH   | 10 h      | 1         |
| NiCoPO/NC         | 300                       | 94                   | 1.0 M KOH   | 10 h      | 2         |
| NiCoP             | 281                       | 42.7                 | 1.0 M KOH   | 6 h       | 3         |
| O-NiCoP           | 310                       | 84                   | 1.0 M KOH   | 40 h      | 4         |
| Fe-Co-P           | 252                       | 33                   | 1.0 M KOH   | 24 h      | 5         |
| D-Ni-MOF          | 219                       | 48.2                 | 1.0 M KOH   | 50 h      | 6         |
| CoP/MoP@NC/CC     | 270                       | 40                   | 1.0 M KOH   | 20 h      | 7         |

Table 1. OER performance of metal phosphides

## References

- 1 Q. Wang, Z. Liu, H. Zhao, H. Huang, H. Jiao, Y. Du, *J. Mater. Chem. A*, 2018, 6, 18720-18727.
- 2 C. Wang, W. Chen, D. Yuan, S. Qian, D. Cai, J. Jiang, S. Zhang, *Nano Energy*, 2020, 69, 104453.
- 3 J. Kim, B.J. Min, T. Kwon, T. Kim, H.C. Song, H.C. Ham, H. Baik, K. Lee, J.Y. Kim, *Chem Asian J.*, 2021, 16, 3630-3635.
- 4 D. Li, C. Zhou, Y. Xing, X. Shi, W. Ma, L. Li, D. Jiang, W. Shi, *Chem. Commun.*, 2021, 57, 8158-8161.
- 5 K. Liu, C. Zhang, Y. Sun, G. Zhang, X. Shen, F. Zou, H. Zhang, Z. Wu, E.C. Wegener, C.J. Taubert, J.T. Miller, Z. Peng, Y. Zhu, *ACS Nano*, 2018, 12, 158-167.
- 6 J. Zhou, Y. Dou, X.Q. Wu, A. Zhou, L. Shu, J.R. Li, *Small*, 2020, 16, 1906564.
- 7 Y.-J. Tang, H.-J. Zhu, L.-Z. Dong, A.M. Zhang, S.-L. Li, J. Liu, Y.-Q. Lan, *Appl. Catal. B: Environ.*, 2019, 245, 528-535.
